# Supplementary material for: Metabolomics window into the role of acute kidney injury after coronary artery bypass grafting in diabetic nephropathy progression
Source: PeerJ. 2020 May 14;8:e9111. doi: 10.7717/peerj.9111 (PMC7231503; doi:10.7717/peerj.9111)
Supplement: Data S1 [file peerj-08-9111-s004.xlsx]

## Sheet: raw data of pilot cohort
																						CKD-EPI						CKD-EPI
group	#	gender (0,m/1,f)	age	diabetic retinopathy（0,no/1,yes)	Hx of stroke（0,no/1,yes)	HGB（g/L）	ALB（g/L）	anemia(M<120;F<110)	BMI	SBP	DBP	CHOL	TG	HDL	LDL	Diabetic duration (yr)	FBG (mmol/L)	HbA1c (%)	BUN (mmol/L)	Scr (μmol/L)	UA (μmol/L)	eGFR (ml/min·1.73m2)	UAER (mg/day)	Postoperative BUN (mmol/L)	Postoperative Scr (μmol/L)	Postoperative UA (μmol/L)	Postoperative urinary NGAL (μmol/L)
NAKI	1	1	56	0	0	132	40.6	0	21.6333	169	79	5.78	1.5	0.94	4.35	14	6.3	8.7	5.18	57.6	682.8	99.4	22.3	5.13	70.1	639.8	5.03	83.7
NAKI	2	0	62	0	0	148	43.4	0	27.4348	153	77	4.87	1.71	0.99	3.41	10	9.29	9	7.36	92.8	303.1	76.5	10	7.79	83.4	170.6	35.26	86.1
NAKI	3	1	61	0	0	121	41.5	0	22.8374	144	78	4.87	1.71	0.99	3.41	5	5.85	6.7	5.06	79	324.1	69.8	0	8.46	89.9	260.6	2.31	60.4
NAKI	4	0	62	0	0	136	39.6	0	20.3131	82	60	2.52	1.27	0.75	1.5	12	6.63	8.1	7.34	83.4	442.4	86.6	5.7	8.04	83.2	217.6	33.02	86.4
NAKI	5	0	48	0	0	125	40.2	0	26.5625	127	96	3.54	2.74	0.98	2.2	1	6.57	7.5	5.52	64.9	359.1	130.9	5.8	3.14	63.8	250.1	10.94	131.4
NAKI	6	1	65	1	0	106	47.1	1	17.6693	156	73	3.51	1.38	0.96	2.25	20	6.41	7	6.67	82.2	404.3	64.9	1.7	10.23	89.1	408.8	7.94	58.7
AKI	1	1	58	0	0	134	43.2	0	22.6474	167	86	3.88	1.3	1.04	2.26	10	9.18	7.9	9.59	106.3	412.5	60.1	26.7	16.32	195	505.3	420.46	23.9
AKI	2	0	50	0	0	127	44.6	0	23.5294	113	71	3.83	0.77	1.05	2.39	11	5.75	7.2	8.07	56	215.1	114.6	0	7.54	98.1	272.7	481.28	77
AKI	3	1	69	0	0	102	43.9	1	21.262	143	81	4.82	1.79	1.26	3.05	1	5.04	7.1	8.84	98.8	343.8	60.4	12	9.35	134.6	359	239.31	34.8
AKI	4	0	52	0	0	133	41.5	0	28.0664	139	89	3.06	1.08	0.98	1.79	6	6.29	6.8	5.55	77.1	388.1	101.6	4.6	7.57	149	353.7	349.81	45.8
AKI	5	1	56	1	0	115	37.6	0	32.8824	162	90	4.54	2.31	0.93	3.17	20	7.07	7	5.49	82.1	500.4	69.1	2.4	8.96	144	441.6	105.24	34.9
AKI	6	0	49	0	0	127	42.7	0	25.2363	153	83	3.58	0.97	1.34	1.76	10	9.51	9.5	7.24	74	386.9	109	3.1	10.35	150	317.7	350.64	46.4

## Sheet: raw data of validation cohort
	#	gender (0,m/1,f)	age	diabetic retinopathy（0,no/1,yes)	Hx of stroke（0,no/1,yes)	Hx of ischemic heart disease （0,no/1,yes)	HGB（g/L）	ALB（g/L）	anemia(M<120;F<110)	BMI	SBP	DBP	CHOL	TG	HDL	LDL	Diabetic duration (yr)	FBG (mmol/L)	HbA1c (%)	BUN (mmol/L)	Scr (μmol/L)	UA (μmol/L)	eGFR (CKD-EPI)	UAER (mg/day)	Postoperative BUN (mmol/L)	Postoperative Scr (μmol/L)	Postoperative UA (μmol/L)	Postoperative urinary NGAL (μmol/L)	Postoperative eGFR (CKD-EPI)	concentration of Azelaic acid (ng/ml)	concentration of Trans-4-Hydroxy-L-Proline (ng/ml)
DM-NAKI	1	0	52	0	0		142	44.7	0	23.9	175	111	6.81	1.94	1.3	1.4	8	7.11	7.9	4	57.6	498	112.2	15.3	4.15	58.5	440.5	5.01	111.4	3920	41
DM-NAKI	2	1	53	0	0		132	50.1	0	20.1	169	99	5.94	3.28	1.03	4	4	8.53	11.6	6	60.78	303.1	100.2	5.3	7.27	75.1	205	6.4	78.5	2704	40
DM-NAKI	3	1	63	0	0		112	43.9	0	25.4	162	82	4.78	1.88	1.07	3.11	9	8.24	12.76	5.18	79	324.1	68.8	29.1	6.52	75	342.3	22	73.3	2699	29
DM-NAKI	4	0	61	1	0		103	41.3	1	23.7	159	71	4.21	2.26	0.85	2.79	16	14.2	9.4	7.21	78.3	397	94	20.3	9.5	88.6	376	21	81.3	1232	41
DM-NAKI	5	1	68	0	0		146	38.2	0	24.1	165	85	2.75	0.93	1.31	1.43	9	3.75	7.01	5.54	66.5	359.1	82.6	3	3.3	73.7	390	4.3	72.3	1009	39
DM-NAKI	6	0	69	0	0		152	47.1	0	25.3	170	89	2.45	1.14	1.25	1.45	9	6.3	5.6	6.86	81.2	455	84.9	28.3	7.65	82.7	400.3	9.3	83.7	584	69
DM-NAKI	7	1	54	0	0		176	39.6	0	22.9	155	86	4.47	1.43	1.45	2.53	5	4.8	6.4	5.34	60	682.8	99.5	6.4	6.21	66	497	4.75	91.2	989	36
DM-NAKI	8	0	56	1	0		131	41.2	0	20.9	131	88	3.31	1.22	0.36	1.95	14	4.2	7.7	6.89	77.4	303.1	98.9	11.8	7.9	75.8	286.4	21.65	102.1	3616	42
DM-NAKI	9	1	75	0	0		130	37.6	0	24.7	139	61	3.25	2.48	0.85	1.65	6	6.88	8.43	5.08	79	371	63.2	10.5	5.11	86.3	277.1	3.18	57.1	1995	278
DM-NAKI	10	1	57	1	0		128	38.4	0	26.1	130	66	3.96	1.14	1.1	2.47	20	7.99	7.8	7.15	83.4	438.4	67.6	22.4	8.7	91	344	45	60.5	210	39
DM-NAKI	11	0	50	0	0		122	43.9	0	22.1	108	78	5.68	1.73	1.18	3.68	18	7.45	7.4	4.87	64.9	362	129.1	7.5	5.4	74.4	321.5	10.54	108.3	990	46
DM-NAKI	12	1	49	0	0		136	49.2	0	18.2	122	77	4.59	1.22	0.7	3	6	7.98	9.9	7.1	52	399.6	108	6.7	7.7	63	389.7	7.35	99.8	1722	62
DM-NAKI	13	0	75	1	0		158	39.2	0	28.6	165	85	2.75	0.51	0.92	1.27	15	3.53	6.2	5.3	57.6	782.3	95.4	4.5	6.54	69.3	599.2	6.83	98.8	857	52
DM-NAKI	14	1	51	0	0		119	47.9	0	21.2	137	78	4.28	1.41	0.75	3.03	5	5.4	5.4	6.45	92.8	313	62.3	12.3	7.4	105	301	5.67	53.1	2351	79
DM-NAKI	15	1	51	0	0		122	45.3	0	29.8	158	101	7.46	2.82	1.31	4	4	5.8	6.3	5.15	70	338.8	86.7	21.5	6.78	83	297.4	2.64	70.5	1861	60
DM-NAKI	16	1	49	1	0		92	38.4	1	25	94	60	3.1	1.16	1.02	2.08	9	7.99	8.3	6.6	83.4	442	71.5	19.7	5.98	85	343	5.68	69.5	1677	46
DM-NAKI	17	0	75	0	1		137	38.2	0	28.2	147	84	2.99	0.56	1.16	1.12	11	6.7	7.2	4.4	75	353	89.4	2.3	5.1	78	202.3	10.94	85.2	2142	223
DM-NAKI	18	1	70	0	0		130	36.2	0	22.9	156	63	3.65	1.37	1.2	1.96	6	6.1	6.5	7.34	78.8	415	66.5	15	6	78	345	6.4	66.5	3669	7
DM-NAKI	19	0	73	0	0		144	46	0	27.4	121	63	4.88	1.87	0.97	3.24	4	5	5.74	6.68	82.2	404.3	81.4	28.9	7	88.9	359.7	7.75	74.7	294	29
DM-NAKI	20	1	50	0	0		126	44.7	0	25	172	118	5.73	1.44	0.99	3.45	10	7	7.05	5.33	67.8	751	92	3.4	6.7	84	357	32	70	4353	45
DM-NAKI	21	0	49	0	0		133	41.2	0	21.4	166	98	5.92	2.94	1.13	2.96	4	9.09	9.1	7.34	83.5	278	94.9	12	9.01	89	219.5	11.1	87.2	5320	79
DM-NAKI	22	0	61	0	0		121	47.7	0	27.8	167	79	4.27	1.93	1.26	1.2	7	6.42	6.54	4.23	55.3	328.5	106.9	5	5.12	65.4	385.4	4.5	117.2	3214	154
DM-NAKI	23	1	62	0	0		152	45.3	0	23	154	70	4.98	2.56	0.88	4.59	4	20.4	12.3	6.3	75.8	428.5	73.8	2	8.6	73	417.5	3.46	76.2	1465	43
DM-NAKI	24	0	70	0	0		152	37.8	0	24.4	164	80	3.02	1.67	1.04	2.5	9	4.94	6.57	4.3	51.3	378.1	103.5	19.5	4.5	72	395.5	12.8	97.2	2441	31
DM-NAKI	25	1	55	0	0		124	47.6	0	22.1	168	95	2.74	1.21	0.54	5.4	17	5.03	5.7	6.23	61.3	427.4	98.3	3	8.54	63	441.6	6.86	95.7	1718	46
DM-NAKI	26	1	55	0	0		124	37.9	0	26.7	154	88	5.82	1.55	1.16	1.3	15	4.2	6.56	4.65	45.6	434	108.6	6.7	7.34	50	476	8.24	104.9	1539	100
DM-NAKI	27	0	59	0	0		93	44	1	20.1	140	79	2.97	1.64	0.89	2.35	13	6.4	7.03	7.43	85	247	85.9	5.8	6.45	91	317.5	3.97	79.1	989	44
DM-NAKI	28	0	75	0	0		131	49.1	0	22.8	139	69	3.2	2.32	0.79	3.55	5	7.5	8.7	5.03	77.7	373.2	86.6	30	4.34	84	285.4	16.8	77.9	104	254
DM-NAKI	29	0	60	1	1		133	43.9	0	27	155	70	5.09	2.05	0.75	2.7	14	8.2	8.1	4.34	56.9	624	106.8	2.8	8.3	74	365.3	84	100.9	1220	299
DM-NAKI	30	1	57	0	0		96	39.1	1	20.1	117	74	5.23	2.32	1.31	3.64	20	8.25	7.6	5.46	73.4	366.4	79	17.8	3.43	82.8	311	23.9	68.6	1718	41
DM-NAKI	31	1	44	0	0		127	41.6	0	19	110	80	4.39	2.32	0.69	2.91	6	9.32	12	3.64	55	485	109.8	5.7	6.43	66.1	450	10.33	97.7	1947	39
DM-NAKI	32	0	74	0	0		130	44.2	0	22	158	83	3.09	1.22	0.56	2.57	16	5.12	6.8	6.34	71	357	96.2	5.8	7.5	79.5	524.6	5.18	84.5	1269	58
DM-NAKI	33	0	58	0	0		107	33.5	1	28	137	83	4.02	2.32	1.01	3.45	10	7.3	7.6	7.2	94.3	333	76.6	22.4	8.5	104.7	246	3.7	67.8	899	55
DM-NAKI	34	0	53	0	0		123	37.8	0	30.1	155	88	6.09	1.78	1.32	4.98	10	5.34	5.6	6.9	74	268.5	106	12.8	9.43	78.6	277.4	1.86	99.5	1902	75
DM-NAKI	35	1	50	0	0		170	38.3	0	22.5	99	69	3.02	1.32	1.26	2.2	6	7.1	7.7	7.4	80	396.4	74.2	21	6.87	78.9	342.4	14.5	76.6	1678	41
DM-NAKI	36	0	67	0	0		147	39.1	0	25.4	144	79	2.77	0.93	0.82	4.6	9	7.8	6.5	4.3	80	344.5	87.4	25.6	5.85	75.5	310.1	2..76	94.6	3928	19
DM-NAKI	37	1	72	1	0		127	42.6	0	23.2	150	63	5.21	2.64	0.87	3.6	19	4.24	7.5	5.44	75.3	403.5	68.8	14.7	7.5	95	323	34.7	51.7	2001	41
DM-NAKI	38	1	69	0	0		124	45.9	0	28.4	115	61	4.2	1.73	0.74	2.07	16	7.34	8.3	7.5	65	365.6	83.5	29	6.34	73.6	235	3.76	72.6	1102	198
	#	gender (0,m/1,f)	age	diabetic retinopathy（0,no/1,yes)	Hx of stroke（0,no/1,yes)	Hx of ischemic heart disease （0,no/1,yes)	HGB（g/L）	ALB（g/L）	anemia(M<120;F<110)	BMI	SBP	DBP	CHOL	TG	HDL	LDL	Diabetic duration (yr)	FBG (mmol/L)	HbA1c (%)	BUN (mmol/L)	Scr (μmol/L)	UA (μmol/L)		UAER (mg/day)	Postoperative BUN (mmol/L)	Postoperative Scr (μmol/L)	Postoperative UA (μmol/L)	Postoperative urinary NGAL (μmol/L)		concentration of Azelaic acid (ng/ml)	concentration of Trans-4-Hydroxy-L-Proline (ng/ml)
DM-AKI	39	0	47	0	0		120	35.2	0	24.2	152	78	4.24	1.69	0.91	2.59	4	4.9	9	6.8	82	412.5	97.7	5.4	11.2	163	407	420.46	42.5	52	361
DM-AKI	40	0	47	0	0		125	42.8	0	23.4	152	83	4.04	2.11	0.93	2.66	5	7.99	7.1	7.15	79	278.1	102.2	4.7	9.45	112	231.3	267.99	67	280	114
DM-AKI	41	1	75	1	0		104	46.3	1	23.3	162	80	4.89	1.38	1.16	3.13	12	6.74	7	8.95	63.7	354.2	83.2	19.5	12.3	178.8	496.3	413	23.7	661	405
DM-AKI	42	0	51	0	0		128	43.5	0	26.1	107	84	2.52	0.8	0.85	1.44	5	5.12	7.4	5.74	78.1	489	100.9	9.9	7.25	169.6	397.5	231.79	39.6	302	138
DM-AKI	43	0	54	0	0		144	41.2	0	24.3	135	95	4.08	1.74	0.63	1.36	14	5.72	7.3	4.59	65.4	500.2	123.1	5.6	16.4	155.4	345	105.24	43	412	254
DM-AKI	44	1	71	0	1		109	41.3	0	27	141	67	4.88	1.6	1.03	3.2	11	10.6	11.7	6.35	75.4	386.9	69.3	6.6	7.2	110	297	345.52	43.6	426	450
DM-AKI	45	0	54	0	0		128	43.3	0	19.1	137	91	5.78	4.22	0.92	3.37	9	5.3	5.8	6	45	480.2	121.1	10.4	5.4	201.7	319.4	452.3	31.4	359	230
DM-AKI	46	0	70	1	0		122	43.4	0	22.8	194	83	4.77	1.76	1.12	3.26	18	6.32	9.2	7.1	62.8	230.3	116.5	1.3	9.4	116.4	285	105.87	54.6	886	270
DM-AKI	47	1	60	1	0		117	45.9	0	24.7	149	76	5.84	4.09	1.05	3.75	21	6.88	7.5	8.14	71.2	245	80	8.7	11.3	124.2	319.4	239.41	40.7	489	114
DM-AKI	48	1	75	0	0		128	35.3	0	25	178	85	4.98	1.41	1.95	2.73	10	11.5	12.7	6.2	69.3	443	74.5	11.4	7.4	99	364	333.78	48.1	586	254
DM-AKI	49	1	50	0	0		133	41.7	0	26.7	184	81	8.88	2.99	1.08	5.8	7	9.03	9.8	4.3	84	368.8	70	28	4.75	133.1	496	145.5	40.1	378	300
DM-AKI	50	0	72	0	1		119	47.3	1	27.6	177	79	6.92	2.57	1.17	5.3	4	8.4	7.9	5.98	73.1	385	94.3	19.8	7.8	127	365.2	315.57	48.3	422	400
DM-AKI	51	0	63	0	0		129	49.5	0	25.1	121	71	5.98	2.75	1.3	3.9	9	10.4	6.7	7.68	105	182.7	64.7	23.7	12.3	211.6	423.8	358.93	27.8	210	120
DM-AKI	52	1	50	0	0		128	44.9	0	25.7	123	72	5.08	0.99	1.41	3.33	10	7.8	5.8	6.87	62.7	269.3	101.1	2.7	9.7	106	355.8	481.28	52.8	576	230
DM-AKI	53	1	49	0	0		120	48.6	0	30.5	143	96	4.95	1.22	0.81	2.84	7	10.66	9.5	4.5	57	418.4	104.8	18.6	13.4	123	369.3	248.5	44.4	456	390
DM-AKI	54	0	58	0	0		154	36.7	0	29.9	108	72	4.75	3.21	0.81	2.83	6	10.6	9.5	4.87	78.8	422.8	96	24.6	12.2	155	355.3	319.62	41.8	411	298
DM-AKI	55	1	62	0	0		113	41.3	0	24.5	141	87	6.37	1.82	1.09	4.81	11	9.7	10.7	6.23	66.7	349.5	86.1	1.5	9.6	232.3	467	493	18.8	52	1450
DM-AKI	56	0	54	0	0		138	43.6	0	21.7	162	82	3.55	1.88	1	2.3	5	7.4	11	7.41	57	444.1	110.6	2.4	8.6	101.2	275.8	202.56	72.3	899	45
DM-AKI	57	1	52	0	0		131	44.1	0	25.2	120	88	4.88	1.94	1.23	2.94	4	13.6	11.9	7.03	75.6	443	79.2	6.5	9.7	158	487.7	174.99	32.1	72	190
DM-AKI	58	1	58	0	0		152	40.6	0	22	150	87	4.79	2.78	0.94	2.78	6	3.9	5.8	7	57.2	278.2	98.4	1.2	10.68	88.2	289	102.33	62.5	499	166
DM-AKI	59	0	44	1	0		102	44.3	1	26.7	145	81	5.03	2.94	0.84	2.96	6	7.5	7.6	6.89	64.6	301.1	134.6	4.5	7.4	112.4	358.4	316.34	68.4	912	109
DM-AKI	60	0	69	0	0		126	40.4	0	21.5	143	80	3.79	1.03	1.23	2.75	9	3.8	5.7	5.6	78	499.2	88.9	28.3	11.4	109.4	434.2	284.68	59.3	288	1000
DM-AKI	61	1	50	0	0		137	48.4	0	27.6	167	88	3.02	2.13	0.65	3.87	12	4.43	6.7	4.58	59.2	583	102.9	3.9	9.3	98	213.5	126.48	58.1	359	279
DM-AKI	62	0	55	1	0		134	55	0	22.5	144	89	3.98	1.56	1.04	2.98	14	8.3	7.9	5.7	48.2	278.4	117.9	10.3	17.2	88.6	323.5	105.3	84.8	598	199
DM-AKI	63	0	69	0	0		144	45.9	0	28.9	164	70	4.89	2.09	0.99	3.19	15	4.8	6.2	6.53	78.8	399	88.9	21.9	10.68	150.1	478.2	406.36	40.3	421	299
DM-AKI	64	0	71	0	0		93	40.9	1	20.1	130	82	5.09	3.87	0.75	4	6	6	5.9	7.8	75.5	287.9	91.9	18.8	9.2	189	374.9	409.25	30	377	157
DM-AKI	65	1	64	1	0		123	33.9	0	24.7	170	98	4.12	1.98	1.18	2.79	16	10.6	7.8	3.64	63.7	220.5	89.8	22.1	8.1	108.2	298.5	284.78	46.8	678	289
DM-AKI	66	0	61	0	0		120	33.7	0	27.6	147	73	5.32	3.98	0.67	3.24	21	4.99	5.9	4.77	64	380.8	119.5	2.4	5.98	155.2	199.4	378	41	321	234
DM-AKI	67	0	58	0	0		172	39.8	0	25.2	178	90	4.54	1.34	2.05	1.6	9	7.3	7.4	7.88	51.4	374	112.6	16.4	10.2	91.8	454.7	250	79.7	299	298
DM-AKI	68	1	55	1	0		140	37.6	0	26.2	180	91	2.34	0.45	1.68	4.6	20	6.9	8.2	5.34	75.4	553.6	77.5	25.6	11.3	139.5	179.4	377.55	36.7	421	267
DM-AKI	69	1	65	0	0		126	35.8	0	24.5	174	91	7.32	3.44	0.93	5.78	8	5.73	7.5	4.98	49	487	98.4	4.5	9.2	89.7	386.5	169.4	58.7	477	255
DM-AKI	70	0	70	0	0		131	39.2	0	27.8	117	65	6.03	2.34	0.94	3.27	4	10.6	6.8	7.36	63	450	114.3	6.3	15.4	214.8	402.3	482.5	26	311	377
DM-AKI	71	1	51	1	1		140	38.2	0	26	130	71	5.63	1.29	1.45	2.78	16	5.02	12.7	5.67	57.6	278.4	103.3	14.7	10.5	113.6	310.3	297.5	48.5	499	188
DM-AKI	72	1	50	0	0		145	47.8	0	29.5	141	83	4.92	2.43	0.73	3.16	11	8	13.7	7.09	75.4	320	80.3	25.6	8.79	184.7	398	371.72	27.1	466	486
DM-AKI	73	1	53	0	0		119	42.3	0	29.6	117	63	5.07	3.44	0.55	3.57	6	10.5	7.99	5.63	47.8	377.8	108.6	3.7	12.6	96	295.5	470.75	58.3	411	154
DM-AKI	74	0	61	0	0		127	36.5	0	22.5	136	83	7.23	3.23	0.92	2.33	8	7.9	11.7	4.34	77.8	419.2	95.5	19.2	9.53	284.9	315	486.54	19.7	210	234
DM-AKI	75	1	58	0	0		154	31.8	0	22.01	153	88	4.33	2.07	1.06	3.7	4	5.8	7.8	5.7	72	308	79.7	4.5	11.3	125.6	456	357.17	40.9	976	266
DM-AKI	76	0	51	0	0		125	41.2	0	23.6	121	76	6.5	3.98	1.14	2.4	9	5.4	6.9	7.45	79	355.4	99.3	26.6	7.8	100.5	411.3	210.5	74.7	270	1286
	#	gender (0,m/1,f)	age	diabetic retinopathy（0,no/1,yes)	Hx of stroke（0,no/1,yes)	Hx of ischemic heart disease （0,no/1,yes)	HGB（g/L）	ALB（g/L）	anemia(M<120;F<110)	BMI	SBP	DBP	CHOL	TG	HDL	LDL	Diabetic duration (yr)	FBG (mmol/L)	HbA1c (%)	BUN (mmol/L)	Scr (μmol/L)	UA (μmol/L)		UAER (mg/day)						concentration of Azelaic acid (ng/ml)	concentration of Trans-4-Hydroxy-L-Proline (ng/ml)
DN-micro	77	1	49	0	0	1	137	37.4	0	31.4	154	96	4.95	2.43	0.98	2.06	9	9.43	9.5	3.65	40.6	426.7	117.8	179.2						1010	236
DN-micro	78	0	58	1	0	0	130	38.3	0	19.16	108	72	4.45	3.54	0.78	2.67	8	9.1	9.5	10.55	110.8	264.7	63.4	64.8						2752	1027
DN-micro	79	0	75	1	1	1	95	34.3	1	23.4	139	87	6.37	3.85	1.08	4.81	14	8.56	9.9	4.63	68.4	254.7	100.6	41.2						4389	496
DN-micro	80	0	54	0	0	0	137	27.9	0	21.48	162	107	3.55	1.88	0.99	2.33	5	5.7	7	6.89	89.5	425.4	84.2	89						2421	393
DN-micro	81	1	52	1	0	0	139	33.7	0	24.1	132	88	4.43	1.94	1.21	2.75	10	10.56	12.6	7.67	55.4	298	103.8	82.2						1579	411
DN-micro	82	1	57	0	0	0	128	32.8	0	23.3	136	88	2.71	1.15	0.82	1.57	5	8.15	7.2	8.53	49.8	257.5	104.1	61						940	187
DN-micro	83	0	60	1	0	0	130	23	0	22.67	143	81	3.12	0.73	1.37	1.32	17	9.3	8.3	4.87	63.1	225.1	122.6	54						4372	210
DN-micro	84	1	38	1	1	1	134	34.9	0	25.2	199	122	3.84	1.44	1.22	2.21	5	3.64	6.9	5.01	61	191.9	110.7	110.4						2125	358
DN-micro	85	1	75	1	0	0	145	41.2	0	24.7	139	61	3.25	2.48	0.85	1.84	27	6.62	7.4	4.93	64.1	461.7	81.6	31.8						2000	299
DN-micro	86	1	57	1	0	0	115	30.9	0	26.1	132	66	3.96	1.14	1.11	2.37	22	8.54	13.9	7.82	94.4	401.8	58.2	176.5						877	322
DN-micro	87	0	50	1	0	1	132	30.7	0	22.1	116	78	5.68	2.98	1.17	3.78	22	8.94	13.1	6.13	53.2	339.6	117.2	38.3						3223	387
DN-micro	88	1	49	1	0	0	119	37.2	0	18.2	122	77	4.59	1.22	0.97	3.1	9	8	12.7	3.97	40.9	275.5	109.8	34.6						4236	200
DN-micro	89	0	75	1	0	0	105	29.7	1	29.07	173	85	2.75	0.51	0.91	1.34	18	8.99	6.7	4.07	69.5	234.6	98.8	93.2						1878	275
DN-micro	90	1	51	0	0	0	117	28.8	0	21.4	137	78	4.28	1.41	0.84	3.01	6	7.04	6.3	12.97	113.1	364.3	48.5	37.3						988	361
DN-micro	91	1	51	0	0	0	142	37.8	0	29.78	156	100	7.13	3.91	1.24	1.98	5	7.02	8.9	7.72	112.8	409	49.1	49.7						877	414
DN-micro	92	0	49	1	0	0	129	35.2	0	25.1	116	60	3.1	1.16	0.45	1.18	5	8.2	7.7	8.09	99.1	415.7	76.7	42.6						1423	1223
DN-micro	93	0	66	1	0	0	142	36.2	0	28.24	145	84	2.99	0.92	1.16	1.35	14	6.71	7.2	5.56	126.7	361.7	50.8	126.4						434	461
DN-micro	94	1	75	1	0	0	120	37.8	0	23	156	63	3.65	1.37	1.19	2.08	29	6.1	9.8	10.64	120.8	327.3	38.1	88						898	299
DN-micro	95	1	73	1	0	0	155	39.7	0	27.5	119	63	4.88	1.87	0.97	3.34	27	5.01	9.7	6.76	108.4	358.6	43.9	91.6						765	399
DN-micro	96	0	47	0	0	0	109	35.6	1	24.4	154	110	4.24	1.69	0.9	2.34	7	7.05	11.4	6.78	80.6	410.4	100.6	125.9						2446	378
DN-micro	97	1	75	1	1	0	120	42.8	0	23.5	162	78	4.69	1.4	1.14	1.16	13	12.3	12.9	6.13	96.9	234.6	50	39.5						975	2865
DN-micro	98	0	51	1	0	0	128	41.5	0	26.3	109	86	2.72	1.36	0.69	1.41	15	6	8.5	8.46	71.7	403.5	113	51						1110	438
DN-micro	99	1	54	1	0	1	125	35.7	0	24.5	135	93	2.29	1.76	0.63	1.32	16	5.6	12.6	8.65	70.5	318.9	84.8	187.6						2868	478
DN-micro	100	1	55	0	0	1	77	36.3	1	29.2	138	87	5.09	3.13	0.77	2.86	6	6	7.6	5.85	56.7	298.7	101.1	37.5						4232	499
DN-micro	101	0	59	1	0	0	122	40.1	0	20.5	123	65	3.23	1.64	1.26	2.86	5	10.6	10.5	3.78	115.4	175	59.6	78.2						857	497
DN-micro	102	0	59	1	0	0	93	32.8	1	24	136	79	4.23	2.99	0.93	3.98	9	7.7	12.9	7.89	69.3	273.4	110.6	151.3						1256	235
DN-micro	103	0	61	1	0	0	141	37.6	0	25.1	173	100	4.23	2.53	1.05	2.89	9	9.78	7.5	10.53	49.6	469.7	112.1	97.1						2535	404
DN-micro	104	1	53	1	0	1	111	43.5	0	23.2	133	85	5.78	2.45	0.96	3.09	15	5	6.5	9.12	78.3	354.1	75	119						2855	211
DN-micro	105	0	63	0	0	0	107	30.9	1	24.5	157	93	3.23	1.87	1.17	1.89	5	11.6	7.7	6.32	98.3	275.3	70.3	49.2						1450	320
DN-micro	106	1	51	0	0	0	118	34.4	0	26.3	127	75	3.12	1.78	1.2	1.23	5	9.45	8.1	4.98	43.6	375	113.4	136						2897	240
DN-micro	107	1	44	1	0	0	96	42.7	1	22.5	176	115	4.34	2.97	0.89	2.99	6	5.5	5.9	6.78	45.6	421.2	117.3	76.8						2566	506
DN-micro	108	1	39	0	0	0	114	42.9	0	21.6	147	75	4.86	1.95	1.09	2.04	5	12.4	8.8	5.24	89.3	364.6	70.5	87.5						747	255
DN-micro	109	0	58	1	0	1	142	37	0	25.3	154	89	6.32	3.23	0.83	3.25	15	7.4	10.6	3.82	101.4	437.8	70.3	53.7						434	555
DN-micro	110	1	75	0	0	1	120	34	0	23.3	123	69	6.22	4.23	0.71	3.98	7	4.78	6.4	5.49	65.3	395	80.1	120						3464	590
DN-micro	111	0	58	1	0	0	121	45	0	19.5	133	80	3.67	1.21	1.21	4.31	15	6.4	5.9	7.31	63	418.5	124.3	54.6						3217	614
DN-micro	112	1	53	0	0	0	148	38.5	0	30.1	158	101	3.65	1.64	1.15	1.74	15	10.4	9.3	6.97	73.6	237.7	81.2	85						1065	515
DN-micro	113	0	74	1	0	0	163	39.9	0	23.5	146	75	3.78	2.01	0.94	3.56	18	7.4	7.9	10.43	52.3	456.1	99.8	31						1433	170
DN-micro	114	0	51	1	0	1	107	37.1	1	26.1	165	102	6.42	3.23	0.9	5.35	17	5.5	6.9	4.76	59.1	355.7	111.4	102.4						1534	222
DN-micro	115	1	54	1	1	0	175	43.4	0	27.5	135	70	2.78	1.88	0.98	3.44	10	4.7	6.1	5.82	98.4	502.6	56.5	70.9						987	529
DN-micro	116	0	74	1	0	0	93	36.7	1	27.1	180	89	3.97	1.93	0.76	4.66	21	5.5	6.7	3.75	121	341.3	50.5	178.3						1046	287
DN-micro	117	0	66	1	0	0	137	37.4	0	23.4	157	89	2.45	1.36	1.1	1.86	18	10.4	8.6	7.77	93.1	284.5	73.4	65.1						1775	327
DN-micro	118	0	65	0	0	0	120	46.5	0	26.7	155	79	4.36	2.94	0.82	3.95	5	7.75	9.9	6.49	88.6	354.4	79	78.9						575	426
DN-micro	119	0	51	1	0	1	145	39.5	0	25.6	177	95	3.23	1.7	1.29	1.74	8	9.5	12.3	5.13	75.3	161.3	105.8	66.7						2111	170.5
DN-micro	120	0	69	1	0	1	131	40.5	0	21.3	169	75	5.34	2.94	1.2	1.27	21	7.04	7.12	9.54	61	231.9	96.8	112.3						1003	1940
DN-micro	121	1	47	0	0	0	153	41.2	0	25.3	130	73	2.33	1.26	1.29	1.21	9	5.06	8.8	6.81	53.4	364.6	108.9	276.4						2153	427
DN-micro	122	0	54	1	0	0	123	41.5	0	23.5	147	70	5.23	3.98	0.54	5.07	16	6	7.6	7.53	108	572.4	66.6	45						2448	431
	#	gender (0,m/1,f)	age	diabetic retinopathy（0,no/1,yes)	Hx of stroke（0,no/1,yes)	Hx of ischemic heart disease （0,no/1,yes)	HGB（g/L）	ALB（g/L）	anemia(M<120;F<110)	BMI	SBP	DBP	CHOL	TG	HDL	LDL	Diabetic duration (yr)	FBG (mmol/L)	HbA1c (%)	BUN (mmol/L)	Scr (μmol/L)	UA (μmol/L)		UAER (mg/day)						concentration of Azelaic acid (ng/ml)	concentration of Trans-4-Hydroxy-L-Proline (ng/ml)
DN-macro	123	0	52	0	0	1	92	30.5	1	23.9	175	109	6.8	1.94	1.33	4.92	8	9.6	8.5	8.18	112	356.8	64.7	1347.5						1300	508
DN-macro	124	0	53	1	0	1	101	36.3	1	30.8	179	101	6.16	6	0.94	4.03	19	8.37	10.7	8.79	139.7	481.6	49.4	670						807	264
DN-macro	125	1	63	1	0	0	150	31.3	0	26.4	162	94	4.59	1.88	1.1	3.13	10	8.24	11.8	5.34	69.7	235.5	81	1945.6						190	308
DN-macro	126	0	61	1	0	0	148	23.7	0	22.69	161	73	4.37	2.26	0.85	2.96	17	13.6	9	6.74	71.3	373.7	105.4	5193						1265	1988
DN-macro	127	1	68	1	0	0	129	40.2	0	23.3	165	77	2.55	1.23	0.82	1.46	8	3.75	6.5	6.15	65.1	259.6	84.1	319						5075	560
DN-macro	128	1	69	1	1	0	91	29.4	1	23.8	172	91	4.02	1.12	0.75	1.51	18	5.36	7.8	5.98	129.5	311.9	36.4	2363						1056	792
DN-macro	129	1	54	0	0	0	179	40.1	0	23.8	155	84	5.12	1.43	1.32	2.73	9	4.76	6.5	9.88	74.3	395	80.6	1335						220	178
DN-macro	130	0	56	0	0	0	139	33.8	0	21.52	145	76	3.93	1.22	1.21	1.96	5	4.64	7.9	5.81	85	245.6	87.8	1067						1567	428
DN-macro	131	0	71	1	0	1	120	37.2	0	27	141	67	4.89	1.58	1.1	3.2	5	9.6	13.2	6.03	117.7	373.6	53.7	913.9						1032	1539
DN-macro	132	0	54	1	0	0	143	25	0	19.3	181	123	5.58	6.12	0.96	3.4	17	6.5	6.5	11.21	111	239	64.5	1735.9						323	275
DN-macro	133	0	70	1	1	0	72	28.7	1	23.08	194	83	4.97	1.74	1.21	3.29	19	5.43	9.3	8.03	96.2	356.2	68.7	2368.1						1024	311
DN-macro	134	0	60	1	0	0	127	35.4	0	24.98	160	76	5.84	4.09	1.15	3.8	21	5.34	7.6	9.15	118.2	210.9	57.4	763.2						1432	2000
DN-macro	135	1	75	1	0	0	98	41.3	1	25.1	178	85	4.98	1.39	2.03	2.75	11	8.54	9.4	7.68	110.9	243.8	42.4	476.9						435	562
DN-macro	136	1	50	0	0	1	139	27.9	0	26.7	184	98	8.88	12.01	1.06	5.89	7	7.69	10.5	4.6	65.4	297.6	95.4	2538.7						968	804
DN-macro	137	0	72	1	0	1	143	29.5	0	27.5	175	79	6.92	2.55	1.2	5.21	10	6.4	9.1	5.3	69.2	299	101	1959						800	217
DN-macro	138	0	63	1	0	0	120	39	0	25.1	169	71	5.98	2.77	1.31	3.71	13	9.76	11.7	12.14	130.3	312.9	50.2	925						190	488
DN-macro	139	1	50	1	0	0	124	40.9	0	25.7	127	72	5.28	0.97	1.43	3.35	12	5.4	11.4	5.47	65.6	207	94	603						2134	100
DN-macro	140	1	50	1	0	1	79	30.1	1	23.6	180	109	6.9	5.02	0.53	4.45	11	7.6	7.9	7.48	96.2	275.47	59.5	1533.2						687	700
DN-macro	141	0	55	1	1	0	129	40.5	0	29.4	168	94	4.23	1.42	1.21	3.98	21	4.6	6.6	6.34	88.9	371.4	84.8	708						799	673
DN-macro	142	1	59	0	0	0	111	32	0	27.43	166	75	6.43	3.75	0.95	3.36	9	6.42	5.9	11.5	62.4	387	94.9	2132						1059	230
DN-macro	143	0	73	0	0	0	89	25.2	1	25.4	179	93	3.23	1.43	1.15	1.25	7	4	6.9	3.54	90.3	139.2	72.7	4532						687	798
DN-macro	144	1	68	1	1	1	74	31.4	1	25.64	152	81	2.78	1.92	1.04	1.98	9	15.6	12.6	4.61	109.7	232	45	1883.5						998	628
DN-macro	145	0	70	0	0	0	122	43	0	22.1	153	85	3.77	2.43	0.86	2.05	7	6.92	8.3	8.54	83.6	344.7	81.9	581.3						135	2340
DN-macro	146	0	57	0	0	0	124	41	0	22.6	120	75	4.34	2.09	1.07	2.99	4	10.3	9.6	8.3	86.7	298.1	85.9	942						787	644
DN-macro	147	1	51	1	0	0	129	44.5	0	23.1	163	89	5.75	7.03	0.9	3.25	17	5.5	7.1	7.39	82	383.5	71.6	493.5						1656	20
DN-macro	148	0	63	1	0	0	132	32.9	0	26.13	132	69	4.98	4.02	0.95	4.09	5	7.4	7.5	9.23	71.2	206.2	103.9	1543.7						903	799
DN-macro	149	1	54	0	0	0	86	38.2	1	20.1	186	105	5.98	4.22	1.2	4.32	5	15.6	12.6	7.41	113.9	366.5	47.5	499.6						1924	699
DN-macro	150	0	75	1	0	1	121	28	0	21.7	199	120	5.02	3.64	0.89	4.05	19	6	6.3	6.75	93.7	253.9	68.9	1963.5						353	555
DN-macro	151	0	55	1	0	0	90	35.6	1	24.62	157	85	5.32	2.16	1.06	2.2	16	3.99	5.8	10.57	79.7	237.4	96.6	445						975	876
DN-macro	152	0	73	1	0	0	82	31.7	1	24.8	186	102	4.32	0.82	1.35	1.98	17	7.04	8.6	9.17	113.2	361.8	55.2	2746						757	888
DN-macro	153	1	56	0	0	1	125	30.1	0	26.54	186	112	8.01	6.98	1.04	6.12	15	10.5	10.9	7.69	66.5	313.8	89.8	1992						910	692
DN-macro	154	1	68	1	0	1	154	33.9	0	27.3	181	95	6.32	5.63	0.95	6.32	6	6.64	7	6.35	72.6	301.9	74.3	1827.7						897	765
DN-macro	155	0	66	0	0	0	73	38.9	1	24.7	135	67	4.23	3.99	1.08	1.98	6	7.4	9.3	7.53	121.6	311	53.4	592.5						220	2100
DN-macro	156	0	51	1	0	0	149	31.5	0	25.5	132	68	2.78	0.74	1.34	2.53	20	10.4	7.6	11.2	98.5	365	76.5	1204.4						1865	300

## Sheet:  A vs B metabolomics results
Index	NAKI_1A	NAKI_2A	NAKI_3A	NAKI_4A	NAKI_5A	NAKI_6A	AKI_1A	AKI_2A	AKI_3A	AKI_4A	AKI_5A	AKI_6A	NAKI_1B	NAKI_2B	NAKI_3B	NAKI_4B	NAKI_5B	NAKI_6B	AKI_1B	AKI_2B	AKI_3B	AKI_4B	AKI_5B	AKI_6B	control_mean	case_mean	log2_FC(case_mean/control_mean)	Pvalue	fdr	vip	ION_MODE	Exact mass(Da)	Ionization	Compounds	Class	C_ID	Pathway	KEGG_B_class	KEGG_A_class
MEDP249	9	9	9	9	9	9	9	9	9	9	9	9	57987000	26355000	2434900	9	9	64601000	22605000	27137000	154720000	68193000	19305000	221600000	9	5.54115e+07	22.5538	0.0164545	0.0744466	2.69463	Positive	205.131	[M+H]+	Pantothenol	CoOthersEnzyme Factor &amp; vitamin	C05944	ko00770//Pantothenate and CoA biosynthesis	Metabolism of cofactors and vitamins	Metabolism
MEDN780	9	9	9	12357	42473	5710.5	9	9	17306	9	9375.7	9	1868800	56563000	40292000	58890000	45940000	20690000	9	38121000	53687000	47030000	59723000	48237000	7273.77	3.92535e+07	12.3978	4.31e-05	0.00290451	2.3703	Negative	354.241	[M-H]-	5-iso PGF2VI [(8β)-5,9α,11α-trihydroxy-prosta-6E,14Z-dien-1-oic acid]	Oxidized lipid	-	-	-	-
MEDN609	72689	339970	140010	330190	829960	122340	87060	122860	93858	103050	1606300	97465	1612000	11380000	13499000	21118000	6522900	30962000	4253400	44422000	50945000	65104000	31739000	57748000	328813	2.82754e+07	6.42614	0.00109512	0.0169408	1.99114	Positive	131.058	[M+H]+	Trans-4-Hydroxy-L-Proline	Amino Acid metabolomics	C01157	ko01100//Metabolic pathways;ko00330//Arginine and proline metabolism	Amino acid metabolism;Global and overview maps	Metabolism
MEDP892	9	581210	122650	274430	770270	131090	196290	221110	249880	426150	581840	283330	5729600	289610	31965000	427520	7732300	9	9	20055000	45187000	37877000	1494100	873140	319855	1.26359e+07	5.30396	0.0272442	0.0986108	1.22032	Positive	110.037	[M+H]+	Catechol	Phenols And Its Derivatives	-	-	-	-
MEDN120	179490	1096700	410340	2511800	1926500	153260	779100	1048600	545680	426510	763380	435920	13318000	10052000	3618900	44395000	1835000	27325000	3548800	105790000	50070000	42494000	72559000	18295000	856440	3.27751e+07	5.2581	0.00529126	0.0385979	1.7219	Negative	182.079	[M-H]-	Dulcitol	Carbohydrate metabolomics	C01697	ko01100//Metabolic pathways;ko00052//Galactose metabolism	Carbohydrate metabolism;Global and overview maps	Metabolism
MEDN202	8251000	4098800	1994800	1825300	5799800	1507700	2126900	2557700	3462600	4932100	4262700	3248100	88780000	2698100	353490000	3486300	108340000	8723700	447660	238820000	385070000	371010000	19370000	11962000	3.67229e+06	1.32683e+08	5.17516	0.0167251	0.0747591	3.99239	Negative	146.022	[M-H]-	A-Ketoglutaric Acid	Amino Acid metabolomics	C00026	ko01100//Metabolic pathways;ko01120//Microbial metabolism in diverse environments;ko01110//Biosynthesis of secondary metabolites;ko01130//Biosynthesis of antibiotics;ko01230//Biosynthesis of amino acids;ko05230//Central carbon metabolism in cancer;ko01210//2-Oxocarboxylic acid metabolism;ko04976//Bile secretion;ko01200//Carbon metabolism;ko00250//Alanine, aspartate and glutamate metabolism;ko0022…	Amino acid metabolism;Cancers;Carbohydrate metabolism;Digestive system;Endocrine system;Excretory system;Global and overview maps;Metabolism of other amino acids;Nervous system;Signal transduction	Environmental Information Processing;Human Diseases;Metabolism;Organismal Systems
MEDN213	145460	939880	356610	1819200	1195400	120020	566940	785930	495250	371100	578770	238490	10752000	6649800	2944000	31525000	1395700	22103000	2088900	71292000	33695000	28959000	42861000	12120000	634421	2.21988e+07	5.1289	0.00423348	0.0349027	1.42447	Negative	182.079	[M-H]-	D-Sorbitol	Carbohydrate metabolomics	C00794	ko01100//Metabolic pathways;ko02010//ABC transporters;ko00052//Galactose metabolism;ko00051//Fructose and mannose metabolism	Carbohydrate metabolism;Global and overview maps;Membrane transport	Environmental Information Processing;Metabolism
MEDP083	903720	4459100	261070	1007200	1661800	584920	799850	300650	119590	633440	1563400	476610	1940300	9914000	30624000	4501200	8878200	3118600	29135000	69956000	49607000	79393000	153110000	3195100	1.06428e+06	36947700	5.11754	0.0196774	0.0815679	1.8288	Negative	483.969	[M-H]-	Uridine triphosphate (UTP)	Nucleotide metabolomics	C00075	ko01100//Metabolic pathways;ko00240//Pyrimidine metabolism;ko04080//Neuroactive ligand-receptor interaction	Global and overview maps;Nucleotide metabolism;Signaling molecules and interaction	Environmental Information Processing;Metabolism
MEDP087	50447	115470	632510	58326	162660	90538	1010100	105350	603190	859300	571800	43017	1223600	21976000	21125000	2863700	2062700	26973000	711760	1235100	10362000	10134000	8426500	19632000	358559	1.05604e+07	4.88032	0.0036027	0.0310837	1.19948	Positive	217.14	[M+H]+	L-Alanyl-L-Lysine	Amino Acid metabolomics	-	-	-	-
MEDP205	463550	1420900	13739000	266420	2543100	905990	11042000	1164800	7270900	9962200	13557000	435450	2788700	317020000	211520000	12993000	25104000	334980000	28267000	3200300	103400000	203430000	321370000	251090000	5.23094e+06	1.51264e+08	4.85385	0.0031822	0.0293078	4.53352	Positive	161.105	[M+H]+	L-Carnitine	Camitine	C00318	ko04976//Bile secretion	Digestive system	Organismal Systems
MEDP250	1793400	6348800	580140	1458700	7413900	1971100	197000	440500	620440	676710	16412000	2677900	89101000	22513000	3967200	142160	193570	180120000	118420000	39859000	243550000	96543000	9849100	302690000	3.38255e+06	9.22457e+07	4.7693	0.0129013	0.0638185	3.23196	Positive	376.138	[M+H]+	Riboflavin	CoOthersEnzyme Factor &amp; vitamin	C00255	ko01100//Metabolic pathways;ko01110//Biosynthesis of secondary metabolites;ko04977//Vitamin digestion and absorption;ko00740//Riboflavin metabolism	Digestive system;Global and overview maps;Metabolism of cofactors and vitamins	Metabolism;Organismal Systems
MEDP523	1696800	3486700	50455000	1149800	7548300	3040400	40076000	4183000	29020000	35492000	47199000	1571900	8513200	513930000	459430000	43942000	75706000	424600000	75201000	9938100	279250000	393850000	493520000	490840000	1.87432e+07	2.72393e+08	3.86125	0.00137294	0.0192015	6.26528	Positive	161.105	[M+H]+	DL-Carnitine	Camitine	C00318	ko04976//Bile secretion	Digestive system	Organismal Systems
MEDN544	9472000	19091000	7811900	8901700	34901000	8931500	5882100	14748000	9738900	10284000	11680000	9726200	74563000	15133000	316170000	10074000	95945000	9601200	2636800	223240000	415060000	387000000	23124000	24486000	1.25974e+07	1.33086e+08	3.40117	0.0237721	0.0911109	3.83813	Negative	146.058	[M-H]-	3-Methylglutaric acid	Lipids_Fatty Acids	-	-	-	-
MEDN613	10058000	20197000	8412800	9323200	35900000	9546100	5511400	14883000	9980200	10791000	11955000	9331400	74202000	15771000	311740000	10483000	94580000	7567200	2651000	218200000	416650000	383390000	24832000	25377000	1.29908e+07	1.3212e+08	3.34629	0.0243126	0.0911109	3.81771	Negative	146.058	[M-H]-	2,2-Dimethyl Succinic acid	Lipids_Fatty Acids	-	-	-	-
MEDN426	9908500	20363000	8458500	9763100	36606000	9751700	6341300	15711000	10509000	11153000	12400000	10321000	77038000	16322000	319800000	10766000	96798000	10311000	2657900	223270000	425590000	389820000	25487000	25967000	1.34405e+07	1.35319e+08	3.3317	0.023902	0.0911109	3.86492	Negative	146.058	[M-H]-	2-Methylglutaric Acid	Organic Acid And Its Derivatives	-	-	-	-
MEDP296	6805700	8526300	7854300	2890200	12017000	4422800	5305600	8687500	7290200	4293800	8290700	1099000	6907300	94118000	107390000	4538000	15930000	120740000	13197000	1320900	27912000	132430000	132150000	102080000	6456925	63226100	3.2916	0.00491775	0.0380101	2.81377	Positive	145.085	[M+H]+	4-Guanidinobutyric Acid	Organic Acid And Its Derivatives	C01035	ko01100//Metabolic pathways;ko00330//Arginine and proline metabolism	Amino acid metabolism;Global and overview maps	Metabolism
MEDP510	5068500	19756000	122380000	7311200	26860000	15918000	133330000	9556900	108950000	157190000	188750000	4232800	634240000	691390000	785330000	215570000	361460000	685540000	136170000	217700000	604670000	574310000	816000000	850000000	6.66086e+07	5.47698e+08	3.0396	3.47e-05	0.00285876	9.24654	Positive	203.116	[M+H]+	Acetyl-L-carnitine	Camitine	C02571	ko04931//Insulin resistance	Endocrine and metabolic diseases	Human Diseases
MEDN862	4009300	5267400	1560400	7380300	2186800	1445700	4858300	1179400	783820	714660	4131000	438990	10949000	13101000	14963000	11436000	2517600	8763600	36324000	21216000	29587000	9203100	13206000	4963100	2.82967e+06	1.46858e+07	2.37571	0.00157025	0.0192141	1.02316	Negative	164.047	[M-H]-	Phenylpyruvate	Benzene and substituted derivatives	C00166	ko01100//Metabolic pathways;ko01110//Biosynthesis of secondary metabolites;ko01130//Biosynthesis of antibiotics;ko01230//Biosynthesis of amino acids;ko00360//Phenylalanine metabolism;ko01210//2-Oxocarboxylic acid metabolism;ko00400//Phenylalanine, tyrosine and tryptophan biosynthesis	Amino acid metabolism;Global and overview maps	Metabolism
MEDP618	25165000	131480000	132250000	15737000	104600000	42672000	137720000	96804000	159170000	154730000	128440000	36024000	84093000	711780000	844280000	128840000	6854100	910980000	116470000	72667000	586160000	669450000	319650000	766040000	97066000	4.34772e+08	2.16322	0.00553265	0.0389427	7.07178	Positive	245.163	[M+H]+	2-Methylbutyroylcarnitine	Lipids_Fatty Acids	-	-	-	-
MEDP450	11829000	35881000	13611000	12982000	21874000	11232000	5151600	18335000	8708300	8033400	16032000	5841900	4896700	18309000	16258000	7650600	502010	13389000	118560000	117560000	103790000	210080000	139070000	7258800	1.41259e+07	6.31103e+07	2.15953	0.0418862	0.122844	1.98252	Positive	137.048	[M+H]+	P-Aminobenzoate	Benzene and substituted derivatives	C00568	ko01100//Metabolic pathways;ko01120//Microbial metabolism in diverse environments;ko00790//Folate biosynthesis	Global and overview maps;Metabolism of cofactors and vitamins	Metabolism
MEDP888	1466900	988160	183670000	3331000	4660200	2431000	1012500	2150000	3531400	334460	1749600	1810200	26110000	25168000	163350000	66248000	14115000	29515000	32363000	33690000	18335000	19514000	77664000	24698000	17261285	4.42308e+07	1.35751	0.00274424	0.0264445	1.07558	Positive	387.023	[M+H]+	2'-Deoxycytidine 5'-Diphosphate	Nucleotide metabolomics	C00705	ko01100//Metabolic pathways;ko00240//Pyrimidine metabolism	Global and overview maps;Nucleotide metabolism	Metabolism
MEDN301	14940000	25490000	6170000	22851000	15711000	3075600	21073000	12629000	2460700	43084000	3997200	3775200	29524000	13403000	6111400	28675000	34119000	6445200	42866000	36243000	36469000	40064000	44487000	24146000	14604725	28546050	0.966856	0.0100367	0.0543596	1.04957	Negative	180.042	[M-H]-	Caffeic Acid	Organic Acid And Its Derivatives	-	-	-	-
MEDN672	128680000	231790000	58719000	182310000	167470000	32081000	182620000	118420000	30232000	307720000	41616000	39371000	230270000	119560000	58566000	228270000	277980000	60311000	302680000	267280000	270000000	297540000	323570000	196110000	1.26752e+08	219344750	0.791187	0.0141196	0.0675919	2.6249	Negative	179.058	[M-H]-	Adrenochrome	Indole And Its Derivatives	-	-	-	-
MEDP577	104920000	489330000	332490000	174300000	381030000	204180000	358930000	335670000	372070000	310580000	267050000	185090000	315500000	601580000	659450000	403620000	102050000	572860000	463010000	187120000	590140000	562470000	504260000	606170000	292970000	4.64019e+08	0.663431	0.0142301	0.067597	4.53061	Positive	231.147	[M+H]+	Isobutyryl carnitine	Camitine	-	-	-	-
MEDP315	445900000	486010000	441480000	465290000	431410000	306720000	499450000	476350000	328400000	469880000	324900000	229970000	496990000	441260000	399080000	473730000	582620000	374760000	491840000	455200000	539360000	482520000	457180000	366800000	4.08813e+08	463445000	0.180956	0.0479089	0.131661	1.66847	Positive	179.058	[M+H]+	Hippuric Acid	Organic Acid And Its Derivatives	C01586	ko00360//Phenylalanine metabolism	Amino acid metabolism	Metabolism
MEDP380	238380000	411380000	276450000	309890000	422180000	257250000	233840000	325170000	279570000	272450000	322660000	212050000	183450000	327420000	267850000	293040000	211350000	322050000	196780000	131010000	213490000	227310000	244850000	276510000	296772500	2.41259e+08	-0.298774	0.0430071	0.125142	1.93224	Positive	311.123	[M+H]+	2-(Dimethylamino)Guanosine	Nucleotide metabolomics	-	-	-	-
MEDP333	110640000	152480000	160730000	172360000	107300000	166540000	177650000	152220000	144650000	143580000	127830000	129380000	73608000	105620000	122360000	112430000	138020000	133280000	133230000	129010000	98515000	85016000	110270000	109780000	1.45447e+08	1.12595e+08	-0.369349	0.000667038	0.0133768	2.05586	Positive	168.028	[M+H]+	Uric Acid	Organic Acid And Its Derivatives	C00366	ko01100//Metabolic pathways;ko01120//Microbial metabolism in diverse environments;ko04976//Bile secretion;ko00230//Purine metabolism	Digestive system;Global and overview maps;Nucleotide metabolism	Metabolism;Organismal Systems
MEDP358	59015000	105030000	106430000	95030000	145280000	76781000	75249000	93785000	87377000	88304000	109930000	52154000	92860000	93262000	59805000	54032000	52753000	126430000	57574000	20375000	28176000	35721000	79117000	59511000	9.11971e+07	6.33013e+07	-0.526752	0.0437212	0.125741	1.44962	Positive	129.079	[M+H]+	Pipecolinic Acid	Organic Acid And Its Derivatives	C00408	ko01100//Metabolic pathways;ko01110//Biosynthesis of secondary metabolites;ko00310//Lysine degradation	Amino acid metabolism;Global and overview maps	Metabolism
MEDP321	51006000	144240000	97096000	42820000	105000000	105870000	101130000	225540000	86945000	59681000	105260000	153640000	18180000	54014000	59319000	69960000	24878000	40588000	111200000	86922000	65031000	77246000	73106000	170420000	106519000	7.09053e+07	-0.587145	0.0331843	0.111921	1.6525	Positive	158.033	[M+H]+	L-Dihydroorotic Acid	Organic Acid And Its Derivatives	C00337	ko01100//Metabolic pathways;ko00240//Pyrimidine metabolism	Global and overview maps;Nucleotide metabolism	Metabolism
MEDP726	80535000	219740000	153600000	71213000	158180000	159930000	164580000	364420000	142010000	101330000	149550000	230820000	33300000	86598000	104900000	115950000	31589000	57177000	168280000	137840000	106140000	114280000	122030000	224540000	1.66326e+08	108552000	-0.615625	0.0240717	0.0911109	2.202	Positive	98.019	[M+H]+	3-Methylthiophene	Heterocyclic compound	-	-	-	-
MEDP800	62875000	169820000	124370000	57566000	124050000	131150000	134990000	302410000	113980000	79178000	117710000	174340000	27207000	65555000	85933000	93902000	26087000	48107000	135920000	108600000	75869000	87458000	95501000	187020000	132703250	8.64299e+07	-0.618601	0.0298767	0.105064	1.98121	Positive	98.0732	[M+H]+	MESITYL OXIDE	Ketones	-	-	-	-
MEDP657	35987000	103730000	72417000	32730000	77304000	78756000	74655000	171680000	64609000	42702000	69356000	110460000	15843000	40448000	44107000	50188000	15200000	24480000	78689000	68827000	49050000	53216000	54366000	110490000	77865500	5.04087e+07	-0.627312	0.0236308	0.0911109	1.50475	Positive	158.131	[M+H]+	Ethyl?Heptanoate	Fatty acyls	-	-	-	-
MEDP656	38377000	119170000	76570000	35847000	81859000	83361000	76860000	171760000	68637000	46343000	78752000	121480000	16543000	43158000	45743000	54183000	15547000	26949000	84705000	71175000	51433000	57919000	55903000	119820000	8.32513e+07	5.35898e+07	-0.635514	0.0199299	0.0817016	1.56872	Positive	158.131	[M+H]+	Isoamyl butyrate	Fatty acyls	-	-	-	-
MEDP673	69350000	183260000	133640000	57893000	135690000	131720000	141130000	320660000	127090000	86588000	126370000	185900000	28177000	67142000	89346000	100610000	22481000	49016000	144190000	120510000	84388000	98723000	100060000	187500000	1.41608e+08	9.10119e+07	-0.637771	0.025443	0.0948677	2.09068	Positive	98.0732	[M+H]+	Cyclohexanone	Ketones	C00414	ko01120//Microbial metabolism in diverse environments;ko01220//Degradation of aromatic compounds	Global and overview maps	Metabolism
MEDN198	701880000	432520000	256600000	281170000	685110000	500800000	162430000	319330000	182340000	468490000	220620000	525310000	154600000	504220000	269790000	221760000	311870000	358190000	7009300	3777000	211090000	167780000	477600000	322270000	3.94717e+08	2.5083e+08	-0.654109	0.0462233	0.129556	2.53887	Negative	192.027	[M-H]-	Citric Acid	Amino Acid metabolomics	C00158	ko01100//Metabolic pathways;ko01120//Microbial metabolism in diverse environments;ko01110//Biosynthesis of secondary metabolites;ko01130//Biosynthesis of antibiotics;ko01230//Biosynthesis of amino acids;ko05230//Central carbon metabolism in cancer;ko01210//2-Oxocarboxylic acid metabolism;ko01200//Carbon metabolism;ko04742//Taste transduction;ko00250//Alanine, aspartate and glutamate metabolism;ko…	Amino acid metabolism;Cancers;Carbohydrate metabolism;Endocrine system;Global and overview maps;Sensory system	Human Diseases;Metabolism;Organismal Systems
MEDP541	196810000	276130000	218130000	419080000	218360000	233820000	55566000	132580000	167420000	60917000	179290000	258600000	157690000	179390000	132300000	357160000	162020000	68067000	22848000	52271000	79732000	25196000	44068000	161270000	2.01392e+08	1.20168e+08	-0.744957	2.29e-05	0.00285876	2.81996	Positive	99.0684	[M+H]+	δ-Valerolactam	Pyridine And Pyridine Derivatives	-	-	-	-
MEDN434	20978000	82377000	45652000	43566000	82445000	30206000	44582000	53160000	52320000	32841000	76561000	32529000	29939000	16254000	35800000	43394000	23482000	41170000	28039000	17818000	16986000	27819000	21546000	38108000	4.97681e+07	2.83629e+07	-0.811215	0.021909	0.0864708	1.50316	Negative	244.07	[M-H]-	Β-Pseudouridine	Nucleotide metabolomics	C02067	ko00240//Pyrimidine metabolism	Nucleotide metabolism	Metabolism
MEDP009	118300000	252580000	60226000	96304000	328590000	61070000	249890000	161570000	115450000	213990000	95059000	88103000	62173000	133950000	83304000	61099000	200490000	39942000	36392000	114360000	39042000	72528000	53688000	98067000	1.53428e+08	8.29196e+07	-0.887774	0.0044423	0.0362218	2.09783	Positive	181.074	[M+H]+	L-Tyrosine	Amino Acid metabolomics	C00082	ko01100//Metabolic pathways;ko01110//Biosynthesis of secondary metabolites;ko01130//Biosynthesis of antibiotics;ko01230//Biosynthesis of amino acids;ko04974//Protein digestion and absorption;ko05230//Central carbon metabolism in cancer;ko00350//Tyrosine metabolism;ko00360//Phenylalanine metabolism;ko01210//2-Oxocarboxylic acid metabolism;ko00970//Aminoacyl-tRNA biosynthesis;ko00400//Phenylalanine…	Amino acid metabolism;Biosynthesis of other secondary metabolites;Cancers;Digestive system;Endocrine system;Global and overview maps;Metabolism of cofactors and vitamins;Metabolism of other amino acids;Nervous system;Neurodegenerative diseases;Substance dependence;Translation	Genetic Information Processing;Human Diseases;Metabolism;Organismal Systems
MEDP223	19445000	60456000	51321000	18965000	42821000	44713000	46027000	117610000	42953000	25868000	31925000	50106000	9061900	21548000	29546000	33534000	7564000	16114000	33426000	31486000	18160000	22383000	24663000	46195000	46017500	2.44734e+07	-0.910968	0.0133583	0.0643626	1.49428	Positive	180.063	[M+H]+	Α-D-Glucose	Carbohydrate metabolomics	C00267	ko01100//Metabolic pathways;ko01120//Microbial metabolism in diverse environments;ko01110//Biosynthesis of secondary metabolites;ko01130//Biosynthesis of antibiotics;ko01200//Carbon metabolism;ko00052//Galactose metabolism;ko00520//Amino sugar and nucleotide sugar metabolism;ko00051//Fructose and mannose metabolism;ko04964//Proximal tubule bicarbonate reclamation;ko00010//Glycolysis / Gluconeogen…	Carbohydrate metabolism;Excretory system;Global and overview maps	Metabolism;Organismal Systems
MEDP508	45486000	114960000	23023000	37163000	169150000	21933000	131600000	67169000	50411000	97156000	36578000	35222000	24118000	62433000	36989000	24060000	97602000	14848000	13817000	49142000	15391000	30080000	20032000	43624000	69154250	3.60113e+07	-0.941367	0.0115375	0.0598658	1.3424	Positive	181.074	[M+H]+	DL-o-Tyrosine	Organic Acid And Its Derivatives	-	-	-	-
MEDP507	35036000	90987000	17756000	28504000	129060000	16962000	103230000	50198000	38139000	73186000	26319000	26940000	18412000	43917000	27584000	17438000	73411000	10580000	10554000	36567000	11359000	20199000	14368000	29002000	5.30264e+07	2.61159e+07	-1.02178	0.0091647	0.0515806	1.25465	Positive	164.047	[M+H]+	2-Hydroxycinnamic acid	Benzene and substituted derivatives	C01772	ko01120//Microbial metabolism in diverse environments;ko01110//Biosynthesis of secondary metabolites;ko00360//Phenylalanine metabolism	Amino acid metabolism;Global and overview maps	Metabolism
MEDP606	39371000	100900000	20490000	31791000	141480000	18466000	110180000	55431000	43252000	80399000	31382000	29036000	20240000	47111000	30730000	19829000	79821000	13051000	11580000	39718000	13223000	22017000	15096000	30093000	5.85148e+07	2.85424e+07	-1.03569	0.0074923	0.0467167	1.3487	Positive	181.11	[M+H]+	2-(3,4-dimethoxyphenyl)ethanamine	Benzene and substituted derivatives	-	-	-	-
MEDP853	33695000	59126000	36216000	55499000	76297000	38873000	138600000	68245000	84837000	44689000	77512000	36587000	20604000	30412000	29330000	66286000	79759000	15366000	27147000	20085000	17173000	15317000	16815000	10576000	6.25147e+07	29072500	-1.10454	0.00603598	0.0414694	1.93508	Positive	139.62	[M-Cl]+	Choline chloride	Others	-	-	-	-
MEDN524	83900000	338630000	168380000	134350000	421430000	70187000	143640000	196990000	171870000	225410000	328320000	203670000	40513000	159130000	96435000	104870000	109400000	64258000	20883000	21021000	138760000	96688000	68101000	177220000	2.07231e+08	9.14399e+07	-1.18035	0.00196918	0.020686	2.95182	Negative	270.162	[M-H]-	Estrone	Hormones	C00468	ko01100//Metabolic pathways;ko04917//Prolactin signaling pathway;ko00140//Steroid hormone biosynthesis;ko04913//Ovarian Steroidogenesis	Endocrine system;Global and overview maps;Lipid metabolism	Metabolism;Organismal Systems
MEDP519	120490000	199810000	209940000	313160000	351730000	95138000	314060000	236680000	207860000	119800000	183270000	94360000	154720000	71012000	119930000	145080000	82427000	86872000	26935000	34432000	63426000	58364000	44041000	85470000	2.03858e+08	8.10591e+07	-1.33052	0.00150214	0.0192141	3.74532	Positive	131.095	[M+H]+	L-Norleucine	Amino Acid metabolomics	-	-	-	-
MEDP423	25431000	7151800	44582000	16863000	9639000	46135000	37826000	27038000	19773000	39031000	13609000	20768000	10142000	1991100	14419000	1210800	33317000	5415900	15149000	21225000	2057900	9	2582900	4958400	25653900	9.37242e+06	-1.45269	0.0070552	0.0460834	1.29617	Positive	97.9769	[M+H]+	Phosphoric Acid	Organic Acid And Its Derivatives	C00009	ko01100//Metabolic pathways;ko02010//ABC transporters;ko04978//Mineral absorption;ko05012//Parkinson disease;ko00190//Oxidative phosphorylation	Digestive system;Energy metabolism;Global and overview maps;Membrane transport;Neurodegenerative diseases	Environmental Information Processing;Human Diseases;Metabolism;Organismal Systems
MEDP379	489560000	540260000	399600000	448880000	428720000	454660000	227450000	321870000	305380000	336560000	228350000	202700000	55432000	121060000	136590000	202920000	136030000	149060000	144540000	79141000	147020000	77234000	203020000	137540000	365332500	1.32466e+08	-1.46359	6.56e-05	0.00304188	5.75491	Positive	195.053	[M+H]+	3-Hydroxyhippuric Acid	Organic Acid And Its Derivatives	-	-	-	-
MEDP401	24561000	20028000	15580000	19799000	54593000	5034900	11352000	19225000	10801000	8611200	10510000	4875800	2300100	8837900	4722500	21405000	7540700	9624600	1382500	1518800	3213600	3122400	2686400	5135600	1.70809e+07	5.95751e+06	-1.5196	0.0166587	0.0747591	1.05777	Positive	297.09	[M+H]+	5'-Deoxy-5'-(Methylthio) Adenosine	Nucleotide metabolomics	C00170	ko01100//Metabolic pathways;ko00270//Cysteine and methionine metabolism	Amino acid metabolism;Global and overview maps	Metabolism
MEDP546	20566000	9	38601000	9	9	28897000	53026000	51211000	60988000	12189000	24875000	18262000	4864800	11511000	8286700	24830000	9	17679000	2291100	5150500	4705400	8153300	10694000	5818300	2.57179e+07	8.66534e+06	-1.56945	0.0366147	0.116381	1.22751	Positive	133.053	[M+H]+	Oxindole	Indole And Its Derivatives	C12312	ko01110//Biosynthesis of secondary metabolites	Global and overview maps	Metabolism
MEDN816	84222000	171550000	48097000	126760000	112830000	41026000	40142000	76645000	17065000	12124000	54021000	39042000	7661600	30989000	25146000	34212000	27965000	25901000	7418600	15048000	10532000	15287000	51248000	23217000	68627000	2.28854e+07	-1.58435	0.00474525	0.0370629	2.16306	Negative	195.053	[M-H]-	4-Hydroxyhippurate	Benzene and substituted derivatives	-	-	-	-
MEDN623	68308000	133080000	34377000	95889000	85922000	34156000	29758000	62706000	16401000	9989100	40979000	31701000	6021400	24026000	19140000	26189000	21089000	20930000	6247500	10906000	8744000	11310000	38029000	17854000	5.36055e+07	1.75405e+07	-1.61169	0.0040535	0.0345599	1.94459	Negative	195.053	[M-H]-	Salicyluric acid	Benzene and substituted derivatives	-	-	-	-
MEDN621	525800000	1418500000	827720000	1610000000	1768100000	721990000	1119800000	1122300000	1108700000	406250000	730160000	465720000	143020000	391610000	162030000	768330000	9	379500000	56765000	83695000	322290000	201600000	134090000	379000000	9.85003e+08	2.51828e+08	-1.96769	0.000194018	0.0068553	9.79224	Negative	213.01	[M-H]-	Indoxylsulfuric acid	Organic Acid And Its Derivatives	-	-	-	-
MEDN826	25508000	88522000	63443000	139770000	142320000	74697000	24719000	121340000	9	32951000	40805000	46128000	4815000	30443000	32352000	16143000	7348600	29642000	1301700	5950800	410300	884780	3016400	68766000	6.66836e+07	1.67561e+07	-1.99264	0.00517607	0.0384065	2.28121	Negative	182.058	[M-H]-	3-(3-Hydroxyphenyl)-3-hydroxypropanoic acid	Organic Acid And Its Derivatives	-	-	-	-
MEDP251	24042000	7924400	7347500	9834400	59998000	27698000	43589000	24738000	11679000	12410000	19373000	15243000	3696500	5701200	1855500	5082400	950840	11278000	1615000	1566000	7895400	6027000	14668000	5001200	2.19897e+07	5.44475e+06	-2.01389	0.00775457	0.047163	1.25292	Positive	137.048	[M+H]+	Trigonelline	CoOthersEnzyme Factor &amp; vitamin	C01004	ko00760//Nicotinate and nicotinamide metabolism	Metabolism of cofactors and vitamins	Metabolism
MEDP831	51589000	73038000	68342000	130050000	96103000	62767000	34750000	45940000	86067000	47529000	52800000	25621000	19508000	20817000	11953000	15484000	6050200	17467000	13005000	2271600	30247000	9406000	7950900	11011000	6.45497e+07	13764225	-2.22949	5.46e-05	0.00304188	2.53596	Positive	75.0684	[M+H]+	1-Aminopropan-2-ol	Alcohol	-	-	-	-
MEDP084	59455000	95500000	84162000	138150000	108080000	89054000	47685000	59499000	99045000	61103000	54914000	22678000	21230000	23212000	13610000	14998000	7449700	18508000	13413000	1916700	32088000	10309000	7878000	13457000	7.66104e+07	1.48391e+07	-2.36814	2e-05	0.00285876	2.84414	Positive	75.0684	[M+H]+	Trimethylamine N-Oxide	Amino Acid metabolomics	C01104	ko01120//Microbial metabolism in diverse environments	Global and overview maps	Metabolism
MEDP562	36491000	53047000	18976000	7951000	42679000	9411100	14924000	28324000	16029000	7533800	38089000	13215000	8163100	22649000	8202800	803910	1020600	4318500	260210	717810	1137400	3356700	1115600	3462800	2.38892e+07	4.6007e+06	-2.37643	0.00033032	0.00933371	1.35762	Positive	166.063	[M+H]+	3-(2-Hydroxyphenyl)propionic acid	Organic Acid And Its Derivatives	C01198	ko01120//Microbial metabolism in diverse environments;ko00360//Phenylalanine metabolism	Amino acid metabolism;Global and overview maps	Metabolism
MEDP111	40796000	58094000	20287000	8360700	44744000	9826300	15656000	30203000	16340000	8593100	40206000	14840000	8087400	24863000	8659600	843040	1073800	4466600	299440	735330	1111800	3342200	1185200	3434700	25662175	4.84184e+06	-2.40602	0.000294508	0.0091052	1.40647	Positive	166.063	[M+H]+	3-(4-Hydroxyphenyl)-Propionic Acid	Benzene and substituted derivatives	-	-	-	-
MEDN647	10404000	49649000	5412800	59676000	28254000	21114000	11455000	13737000	4070300	44004000	14577000	17072000	2079100	9901200	4126600	1354700	629190	9715400	183890	570120	869740	1495000	969440	2974000	23285425	2.9057e+06	-3.00247	0.00216272	0.0219827	1.37	Negative	110.037	[M-H]-	Hydroquinone	Phenols And Its Derivatives	-	-	-	-
MEDN300	58120000	95316000	33347000	66595000	68913000	29304000	59534000	94742000	36242000	83042000	135030000	39050000	14720000	6032000	6512000	12255000	7171300	8885300	2326000	2821900	4133300	6123100	1809900	6244200	6.66029e+07	6.58617e+06	-3.33807	5.94e-05	0.00304188	2.76846	Negative	188.105	[M-H]-	Azelaic Acid	Organic Acid And Its Derivatives	-	-	-	-
MEDN560	8011400	17698000	7170500	97272000	7645700	9030300	4073400	7867200	30305000	38979000	3284000	5758900	6282100	528910	791750	1561500	742580	1101100	248180	69059	1322700	494080	89049	713640	19757950	1162054	-4.08768	0.0349234	0.113654	1.14481	Negative	246.089	[M-H]-	MARMESIN	Carbohydrate metabolomics	-	-	-	-
